# Supplementary material for: CD163 as a marker of M2 macrophage, contribute to predict aggressiveness and prognosis of Kazakh esophageal squamous cell carcinoma
Source: PubMed Central journal article supplement (PMC5400603; doi:10.18632/oncotarget.15630), 2017-02-22
Supplement: oncotarget-08-21526-s001.pdf [file oncotarget-08-21526-s001.pdf]

# CD163 as a marker of M2 macrophage, contribute to predict aggressiveness and prognosis of Kazakh esophageal squamous cell carcinoma

## Supplementary Materials

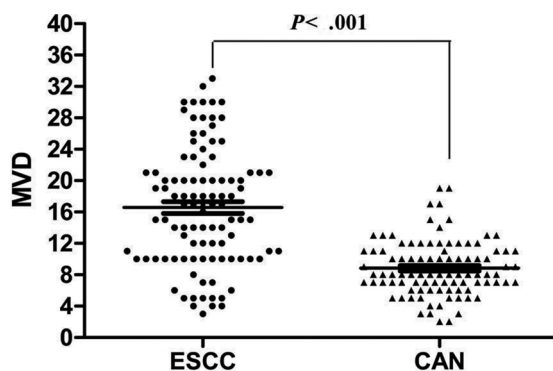

Supplementary Figure 1: The value of microvessel density (MVD) in Kazakh esophageal squamous cell carcinoma (ESCC) was significantly higher compared to Cancer adjacent normal (CAN) tissues.

**Supplementary Table 1: Scoring criteria of immunohistochemistry (IHC) assay with MMP-9 antibody used in this study**

| Staining positive cell |         | Staining intensity |         | Final Score product |         |
|------------------------|---------|--------------------|---------|---------------------|---------|
| Percent (%)            | Score 1 | intensity          | Score 2 | Score 1×Score 2     | Score 3 |
| < 5%                   | 0       | Absent             | 0       | 0–1                 | 0 (–)   |
| 6%–25%                 | 1       | weak               | 1       | 2–3                 | 1 (1+)  |
| 26%–50%                | 2       | moderate           | 2       | 4–6                 | 2 (2+)  |
| 51%–75%                | 3       | strong             | 3       | 8–12                | 3 (3+)  |
| 75%–100%               | 4       |                    |         |                     |         |

Note: IHC staining slides were scored as positive or negative by the percentage and intensity of positive cells. Scoring the percent of positively stained cells—Score 1 (0 = < 5%; 1 = 6% – 25%; 2 = 26% – 50%; 3 = 51% – 75%; and 4 = 76% – 100%). Scoring the intensity of the staining—Score 2 (0 = absent; 1 = weak; 2 = moderate; 3 = strong). The final score was based on multiplying both scores from individual slides (Score 1 × Score 2): 0–1 was negative (–), 2–3 was weak positive (1+), 4–6 was moderately positive (2+), and 8–12 was strong positive (3+).
